# Supplementary material for: Uncommon Dantzig-Wolfe Reformulation for the Temporal Knapsack Problem
Source: Atypon-hosted journal article supplement (doi:10.1287/ijoc.1120.0521), 2012-10-24
Supplement: ijoc.1120.0521-sm-online-supplement.pdf [file ijoc.1120.0521-sm-online-supplement.pdf]

# Online Supplement to: Uncommon Dantzig-Wolfe Reformulation for the Temporal Knapsack Problem

Alberto Caprara, Fabio Furini, Enrico Malaguti

*Department of Electronics, Computer Sciences and Systems,  
University of Bologna,  
40136 Bologna, Italy,*

e-mails: {fabio.furini, enrico.malaguti}@unibo.it

## 1 Detailed instance features

In the following two Tables (1,2), we report some additional information on the instances described in the papers. In detail, for each instance we report the name, the number of constraints (*row*) and the number of variables (*var*). Then we report the value of the continuous relaxation (*lp*), the optimal value (*opt\**) and the bound (*bound\**) computed by the best algorithm presented in the paper. In case the optimal value and the bound do not coincide, the instance is not solved to optimality.

Table 1: First Class Instance Features.

| name | row  | var  | lp        | opt*   | bound*    | name | row  | var   | lp        | opt*   | bound*    |
|------|------|------|-----------|--------|-----------|------|------|-------|-----------|--------|-----------|
| I1   | 2688 | 2697 | 73230.21  | 62524  | 62524.00  | I51  | 768  | 4948  | 81409.36  | 71998  | 71998.00  |
| I2   | 2816 | 2825 | 76852.15  | 65046  | 65046.00  | I52  | 896  | 5769  | 93495.19  | 81898  | 81898.00  |
| I3   | 2944 | 2953 | 79598.69  | 67558  | 67558.00  | I53  | 1024 | 6721  | 110137.25 | 97056  | 97056.00  |
| I4   | 3072 | 3081 | 82467.66  | 70316  | 70316.00  | I54  | 1152 | 7382  | 121747.65 | 107491 | 107491.00 |
| I5   | 3200 | 3209 | 89923.52  | 76634  | 76634.00  | I55  | 1280 | 8266  | 137308.63 | 120505 | 120505.00 |
| I6   | 3328 | 3337 | 90672.21  | 77204  | 77204.00  | I56  | 1408 | 9002  | 146998.74 | 129053 | 129053.00 |
| I7   | 3456 | 3465 | 95919.27  | 81690  | 81690.00  | I57  | 1536 | 9865  | 162489.16 | 142486 | 142486.00 |
| I8   | 3584 | 3593 | 99262.82  | 84581  | 84581.00  | I58  | 1664 | 10661 | 172075.23 | 151489 | 151489.00 |
| I9   | 3712 | 3721 | 102724.65 | 87297  | 87297.00  | I59  | 1792 | 11448 | 188109.13 | 165075 | 165097.00 |
| I10  | 3840 | 3849 | 103892.85 | 88889  | 88889.00  | I60  | 1920 | 12498 | 206427.59 | 182813 | 182813.00 |
| I11  | 2688 | 4480 | 103802.28 | 88574  | 88574.00  | I61  | 768  | 2071  | 24633.00  | 22044  | 22044.00  |
| I12  | 2816 | 4749 | 112119.39 | 96366  | 96366.00  | I62  | 896  | 2422  | 29081.00  | 26115  | 26115.00  |
| I13  | 2944 | 4887 | 114630.26 | 97987  | 97987.00  | I63  | 1024 | 2763  | 32215.00  | 29110  | 29110.00  |
| I14  | 3072 | 5153 | 120447.69 | 103747 | 103747.00 | I64  | 1152 | 3103  | 36243.00  | 32692  | 32692.00  |
| I15  | 3200 | 5298 | 121641.43 | 103498 | 103498.00 | I65  | 1280 | 3434  | 41155.00  | 37016  | 37016.00  |
| I16  | 3328 | 5547 | 127386.90 | 108686 | 108686.00 | I66  | 1408 | 3774  | 44071.00  | 39593  | 39593.00  |
| I17  | 3456 | 5745 | 129721.92 | 112017 | 112017.00 | I67  | 1536 | 4164  | 49400.00  | 44735  | 44735.00  |
| I18  | 3584 | 5929 | 136534.29 | 116631 | 116631.00 | I68  | 1664 | 4488  | 53344.00  | 48182  | 48182.00  |
| I19  | 3712 | 6208 | 146245.82 | 125346 | 125346.00 | I69  | 1792 | 4786  | 55799.00  | 50559  | 50559.00  |
| I20  | 3840 | 6462 | 149534.57 | 128454 | 128454.00 | I70  | 1920 | 5142  | 61016.00  | 54842  | 54842.00  |
| I21  | 2688 | 4972 | 101348.05 | 87259  | 87259.00  | I71  | 768  | 2916  | 46214.28  | 40982  | 40982.00  |
| I22  | 2816 | 5161 | 104093.66 | 89548  | 89548.00  | I72  | 896  | 3424  | 54264.62  | 47914  | 47914.00  |
| I23  | 2944 | 5423 | 112511.36 | 96418  | 96418.00  | I73  | 1024 | 3832  | 59692.33  | 52447  | 52447.00  |
| I24  | 3072 | 5658 | 114270.26 | 98019  | 98019.00  | I74  | 1152 | 4316  | 67701.80  | 59790  | 59790.00  |
| I25  | 3200 | 5875 | 120846.51 | 104227 | 104227.00 | I75  | 1280 | 4771  | 75300.45  | 66179  | 66179.00  |
| I26  | 3328 | 6112 | 125679.74 | 107704 | 107704.00 | I76  | 1408 | 5403  | 84719.96  | 75070  | 75070.00  |
| I27  | 3456 | 6380 | 127368.59 | 109805 | 109805.00 | I77  | 1536 | 5793  | 92447.25  | 81982  | 81982.00  |
| I28  | 3584 | 6582 | 135650.71 | 116248 | 116248.00 | I78  | 1664 | 6167  | 96766.53  | 85314  | 85314.00  |
| I29  | 3712 | 6817 | 139600.57 | 119729 | 119729.00 | I79  | 1792 | 6800  | 107506.65 | 95037  | 95037.00  |
| I30  | 3840 | 7026 | 143834.45 | 123463 | 123463.00 | I80  | 1920 | 7241  | 113069.40 | 100031 | 100031.00 |
| I31  | 2688 | 6322 | 118147.88 | 102424 | 102424.00 | I81  | 768  | 5210  | 80878.14  | 71426  | 71426.00  |
| I32  | 2816 | 6546 | 120360.79 | 103159 | 103159.00 | I82  | 896  | 6057  | 93438.94  | 82942  | 82942.00  |
| I33  | 2944 | 6895 | 129601.72 | 111884 | 111884.00 | I83  | 1024 | 6901  | 107806.34 | 96115  | 96115.00  |
| I34  | 3072 | 7209 | 135934.57 | 117903 | 117903.00 | I84  | 1152 | 7737  | 122734.53 | 110102 | 110102.00 |
| I35  | 3200 | 7484 | 139207.04 | 120668 | 120668.00 | I85  | 1280 | 8656  | 134801.82 | 119233 | 119233.00 |
| I36  | 3328 | 7784 | 143078.51 | 123739 | 123739.00 | I86  | 1408 | 9370  | 144003.97 | 128178 | 128178.00 |
| I37  | 3456 | 8089 | 149990.22 | 130308 | 130308.00 | I87  | 1536 | 10271 | 159046.15 | 142056 | 142056.00 |
| I38  | 3584 | 8425 | 154962.59 | 133092 | 133092.00 | I88  | 1664 | 11057 | 173756.92 | 154745 | 154770.00 |
| I39  | 3712 | 8650 | 160788.47 | 138613 | 138613.00 | I89  | 1792 | 11992 | 188147.70 | 167916 | 167916.00 |
| I40  | 3840 | 8977 | 167495.03 | 144612 | 144612.00 | I90  | 1920 | 13025 | 199612.81 | 176876 | 176916.00 |
| I41  | 768  | 2071 | 35900.76  | 30866  | 30866.00  | I91  | 768  | 3117  | 48477.88  | 42685  | 42685.00  |
| I42  | 896  | 2422 | 41410.50  | 35771  | 35771.00  | I92  | 896  | 3594  | 52366.41  | 46526  | 46526.00  |
| I43  | 1024 | 2756 | 47323.86  | 40934  | 40934.00  | I93  | 1024 | 4176  | 61537.48  | 54437  | 54437.00  |
| I44  | 1152 | 3104 | 53126.97  | 46180  | 46180.00  | I94  | 1152 | 4671  | 69087.68  | 60719  | 60719.00  |
| I45  | 1280 | 3433 | 58235.01  | 50324  | 50324.00  | I95  | 1280 | 5209  | 76853.31  | 68432  | 68432.00  |
| I46  | 1408 | 3789 | 64249.15  | 55495  | 55495.00  | I96  | 1408 | 5628  | 81652.19  | 72337  | 72346.00  |
| I47  | 1536 | 4154 | 68933.49  | 59255  | 59255.00  | I97  | 1536 | 6215  | 90864.53  | 80122  | 80122.00  |
| I48  | 1664 | 4476 | 75464.66  | 65465  | 65465.00  | I98  | 1664 | 6730  | 100490.40 | 88460  | 88460.00  |
| I49  | 1792 | 4797 | 80288.60  | 69530  | 69530.00  | I99  | 1792 | 7172  | 105321.35 | 92380  | 92380.00  |
| I50  | 1920 | 5129 | 87439.72  | 75756  | 75756.00  | I100 | 1920 | 7709  | 114205.89 | 100915 | 100915.00 |

Table 2: Second Class Instance Features.

| name | row | var  | lp       | opt*  | bound*   | name | row | var  | lp       | opt*  | bound*   |
|------|-----|------|----------|-------|----------|------|-----|------|----------|-------|----------|
| U1   | 459 | 1000 | 50030.04 | 49797 | 49797.00 | U51  | 445 | 1000 | 35329.47 | 34771 | 34774.00 |
| U2   | 468 | 1000 | 49599.06 | 49490 | 49490.00 | U52  | 467 | 1000 | 34412.77 | 33827 | 33838.75 |
| U3   | 485 | 1000 | 49295.61 | 49020 | 49020.00 | U53  | 464 | 1000 | 33787.34 | 33197 | 33216.00 |
| U4   | 484 | 1000 | 49134.97 | 48972 | 48972.00 | U54  | 443 | 1000 | 33549.08 | 32942 | 32955.33 |
| U5   | 474 | 1000 | 50311.73 | 50149 | 50149.00 | U55  | 456 | 1000 | 33949.75 | 33318 | 33325.88 |
| U6   | 465 | 1000 | 49649.53 | 49466 | 49466.00 | U56  | 457 | 1000 | 34120.88 | 33424 | 33465.54 |
| U7   | 487 | 1000 | 50984.65 | 50666 | 50666.00 | U57  | 437 | 1000 | 33971.65 | 33438 | 33440.50 |
| U8   | 474 | 1000 | 50022.45 | 49859 | 49859.00 | U58  | 435 | 1000 | 32683.93 | 32059 | 32113.75 |
| U9   | 473 | 1000 | 50614.47 | 50358 | 50358.00 | U59  | 464 | 1000 | 34452.02 | 33881 | 33887.50 |
| U10  | 468 | 1000 | 50078.58 | 49961 | 49961.00 | U60  | 447 | 1000 | 33566.19 | 32973 | 33010.36 |
| U11  | 452 | 1000 | 46819.17 | 46266 | 46266.00 | U61  | 433 | 1000 | 32004.41 | 31464 | 31496.89 |
| U12  | 466 | 1000 | 46321.00 | 45628 | 45628.00 | U62  | 460 | 1000 | 30905.62 | 30330 | 30335.20 |
| U13  | 467 | 1000 | 46056.57 | 45531 | 45531.00 | U63  | 439 | 1000 | 31239.41 | 30704 | 30723.65 |
| U14  | 461 | 1000 | 45808.75 | 45218 | 45218.00 | U64  | 453 | 1000 | 31876.25 | 31315 | 31353.36 |
| U15  | 470 | 1000 | 46629.84 | 45978 | 45978.00 | U65  | 448 | 1000 | 31733.75 | 31177 | 31186.00 |
| U16  | 465 | 1000 | 46546.72 | 45795 | 45795.00 | U66  | 477 | 1000 | 31608.03 | 31059 | 31067.50 |
| U17  | 477 | 1000 | 47161.15 | 46471 | 46471.00 | U67  | 444 | 1000 | 32401.24 | 31761 | 31834.68 |
| U18  | 466 | 1000 | 46534.87 | 45877 | 45877.00 | U68  | 448 | 1000 | 30933.08 | 30445 | 30459.71 |
| U19  | 467 | 1000 | 47047.86 | 46356 | 46356.00 | U69  | 473 | 1000 | 32663.75 | 32038 | 32066.45 |
| U20  | 461 | 1000 | 46880.86 | 46217 | 46217.00 | U70  | 439 | 1000 | 32135.82 | 31650 | 31705.00 |
| U21  | 445 | 1000 | 42738.79 | 41946 | 41946.00 | U71  | 439 | 1000 | 30916.17 | 30320 | 30487.62 |
| U22  | 478 | 1000 | 42008.41 | 41346 | 41346.00 | U72  | 456 | 1000 | 30915.38 | 30338 | 30495.40 |
| U23  | 476 | 1000 | 41389.29 | 40694 | 40694.00 | U73  | 444 | 1000 | 30457.51 | 29963 | 30051.37 |
| U24  | 471 | 1000 | 41720.49 | 40955 | 40955.00 | U74  | 438 | 1000 | 30088.56 | 29544 | 29626.54 |
| U25  | 454 | 1000 | 41979.16 | 41235 | 41235.00 | U75  | 465 | 1000 | 30346.40 | 29835 | 29973.79 |
| U26  | 449 | 1000 | 41948.49 | 41168 | 41168.00 | U76  | 439 | 1000 | 30741.84 | 30156 | 30319.61 |
| U27  | 456 | 1000 | 42873.33 | 42054 | 42054.00 | U77  | 431 | 1000 | 30319.63 | 29790 | 29928.42 |
| U28  | 462 | 1000 | 42123.14 | 41475 | 41475.00 | U78  | 456 | 1000 | 29930.41 | 29380 | 29479.91 |
| U29  | 477 | 1000 | 43109.19 | 42277 | 42277.00 | U79  | 453 | 1000 | 30179.69 | 29666 | 29790.09 |
| U30  | 457 | 1000 | 42389.84 | 41684 | 41684.00 | U80  | 437 | 1000 | 30341.32 | 29784 | 29935.58 |
| U31  | 446 | 1000 | 39410.92 | 38685 | 38685.00 | U81  | 409 | 1000 | 29969.06 | 29451 | 29586.24 |
| U32  | 470 | 1000 | 38726.94 | 38106 | 38106.00 | U82  | 451 | 1000 | 28709.27 | 28207 | 28307.75 |
| U33  | 463 | 1000 | 38702.67 | 38067 | 38067.00 | U83  | 452 | 1000 | 28299.20 | 27855 | 27979.38 |
| U34  | 449 | 1000 | 37881.00 | 37159 | 37159.00 | U84  | 447 | 1000 | 29947.00 | 29472 | 29560.59 |
| U35  | 454 | 1000 | 38548.77 | 37826 | 37826.00 | U85  | 441 | 1000 | 28811.23 | 28335 | 28453.58 |
| U36  | 455 | 1000 | 38278.68 | 37488 | 37491.33 | U86  | 451 | 1000 | 29104.73 | 28564 | 28699.96 |
| U37  | 444 | 1000 | 39010.70 | 38237 | 38236.75 | U87  | 452 | 1000 | 29090.14 | 28584 | 28718.29 |
| U38  | 445 | 1000 | 38083.02 | 37372 | 37372.00 | U88  | 452 | 1000 | 28961.51 | 28445 | 28562.54 |
| U39  | 472 | 1000 | 39135.98 | 38374 | 38384.00 | U89  | 437 | 1000 | 29495.70 | 29042 | 29144.33 |
| U40  | 442 | 1000 | 38641.71 | 37965 | 37965.00 | U90  | 430 | 1000 | 28415.19 | 27916 | 28061.62 |
| U41  | 439 | 1000 | 36201.11 | 35538 | 35538.00 | U91  | 441 | 1000 | 28209.62 | 27727 | 27872.82 |
| U42  | 475 | 1000 | 35566.34 | 34934 | 34944.50 | U92  | 467 | 1000 | 27122.92 | 26630 | 26771.13 |
| U43  | 476 | 1000 | 35717.20 | 35071 | 35071.00 | U93  | 450 | 1000 | 28277.61 | 27817 | 27916.20 |
| U44  | 452 | 1000 | 36234.23 | 35596 | 35596.00 | U94  | 449 | 1000 | 27700.70 | 27316 | 27387.50 |
| U45  | 469 | 1000 | 35755.45 | 35112 | 35113.00 | U95  | 462 | 1000 | 27596.56 | 27126 | 27251.84 |
| U46  | 456 | 1000 | 35215.91 | 34529 | 34533.54 | U96  | 446 | 1000 | 27980.33 | 27485 | 27623.50 |
| U47  | 478 | 1000 | 36510.13 | 35866 | 35868.50 | U97  | 475 | 1000 | 27484.81 | 27006 | 27111.65 |
| U48  | 465 | 1000 | 35197.25 | 34564 | 34564.00 | U98  | 462 | 1000 | 27371.23 | 26904 | 27000.10 |
| U49  | 436 | 1000 | 36499.11 | 35883 | 35883.00 | U99  | 444 | 1000 | 29277.14 | 28759 | 28877.14 |
| U50  | 454 | 1000 | 35886.20 | 35311 | 35322.20 | U100 | 438 | 1000 | 27714.50 | 27297 | 27385.89 |
